# Supplementary material for: Enantiotropic ferroelectric nematic phase in a single compound
Source: Royal Society of Chemistry journal article supplement (doi:10.1039/d3cc04296k), 2023-01-01
Supplement: d3cc04296k1.pdf [file d3cc04296k1.pdf]

Electronic supplementary information for

## **Enantiotropic ferroelectric nematic phase in a single compound**

Jakub Karcz<sup>1</sup>, Natan Rychłowicz<sup>1</sup>, Małgorzata Czarnecka<sup>2</sup>, Antoni Kocot<sup>3</sup>, Jakub Herman<sup>1</sup>,  
Przemysław Kula<sup>1</sup>

<sup>1</sup>Institute of Chemistry, Faculty of Advanced Technologies and Chemistry, Military University of Technology, ul. gen. S. Kaliskiego 2, 00-908 Warsaw, Poland

<sup>2</sup>Faculty of Electrical Engineering, Automatics, Computer Science and Biomedical Engineering, AGH University of Science and Technology, al. Adama Mickiewicza 30, 30-059 Cracow, Poland

<sup>3</sup>Institute of Materials Engineering, Faculty of Science and Technology, University of Silesia, ul. 75 Pułku Piechoty, 41-500 Chorzów, Poland

Correspondence to: [jakub.karcz@wat.edu.pl](mailto:jakub.karcz@wat.edu.pl)

### **Contents:**

- 1) Materials and methods
- 2) Synthetic procedures
- 3) Mesomorphic properties
- 4) References

## 1) Materials and methods

### Materials

1-bromo-3,5-difluorobenzene was purchased from Trimen Chemicals (Łódź, Poland) and used as received. Magnesium for Grignard reactions (turnings), oxalyl chloride were purchased from Acros-Organics, (Geel, Belgium) and used as received. Toluene, acetone, hydrochloric acid were purchased from Avantor Performance Materials Poland S.A (Gliwice, Poland) and used as received. [1,1'-Bis(diphenylphosphino)ferrocene]dichloropalladium(II) was purchased from Sigma-Aldrich Sp. z.o.o (Poznan, Poland) and used as received. Pyridine was purchased from Lach-ner (Neratovice, Czech Republic) and used as received. THF was distilled from sodium under nitrogen atmosphere prior to use.

### Chemical analysis

Synthesis progress and purity of synthesized compounds were determined using SHIMADZU GCMS-QP2010S (Shimadzu, Kyoto, Japan) series gas chromatograph equipped with quadrupole mass analyser MS(EI), high-performance liquid chromatography HPLC-PDA-MS (APCI-ESI dual source) Shimadzu LCMS 2010 EV (Shimadzu, Kyoto, Japan) equipped with a polychromatic UV-VIS detector (Shimadzu, Kyoto, Japan). and by thin layer chromatography (silica gel on aluminium). Proton ( $^1\text{H}$ ) and carbon ( $^{13}\text{C}$ ) nuclear magnetic resonance (NMR) spectra in  $\text{CDCl}_3$  were collected using a Bruker, model Avance III spectrometer (Bruker, Billerica, MA, USA).

### Isomeric purity check

The synthesis of 1,3-dioxane unit results in a mixture of cist/trans isomers. We obtained a compound **(3)** with approximately 50/50 cist/trans isomer ratio. We can clearly determine which peak on the chromatogram corresponds to which isomer, as the trans isomer is known for having the higher retention time. When we obtained the carboxylic acid **(4)**, we performed series of recrystallization processes as we found out that during the recrystallization, the crystal we obtained was constantly enriched with the trans isomer. We performed the recrystallization process until we obtained over 99% isomeric purity. At every stage, we checked both chemical and isomeric purity of **(4)** by GC-MS analysis of the corresponding methyl ester, which we obtained in a quick esterification reaction of **(4)** with methyl iodide and DBU in toluene.

### POM observation

Microscopic observations were performed using polarizing optical microscope OLYMPUS BX51(Olympus, Shinjuku, Tokyo, Japan) equipped with a Linkam hot stage THMS-600 (Linkam Scientific Instruments Ltd., Tadworth, United Kingdom) with the sample placed between untreated glass plates.

### DSC measurements

DSC measurements were performed using differential scanning calorimeter DSC 204 F1 Phoenix instrument (Netzsch, Selb, Germany) with the scanning rate was  $2\text{ Kmin}^{-1}$  on both the heating and cooling cycles with the isothermal time of 5 minutes between cycles.

### **Dielectric spectroscopy measurements**

The complex dielectric permittivity measurements of 3JK sample are measured in planar and homeotropic cells using dielectric analyzers HP- 4192A and HP- 4294. Commercial 5 $\mu$ m cells (WAT-3 Poland) are used, coated with 150- 200 nm gold and of low sheet resistance ( $R < 0.1 \Omega/\square$ ).

### **DFT calculations**

DFT calculations were performed in Gaussian 16 (Revision C.01)(1) program package with B3LYP(2, 3) functional and 6-311+G(d,p)(4) basis set on the PLGrid ASK Cyfronet Ares cluster.

## 2) Synthetic procedures

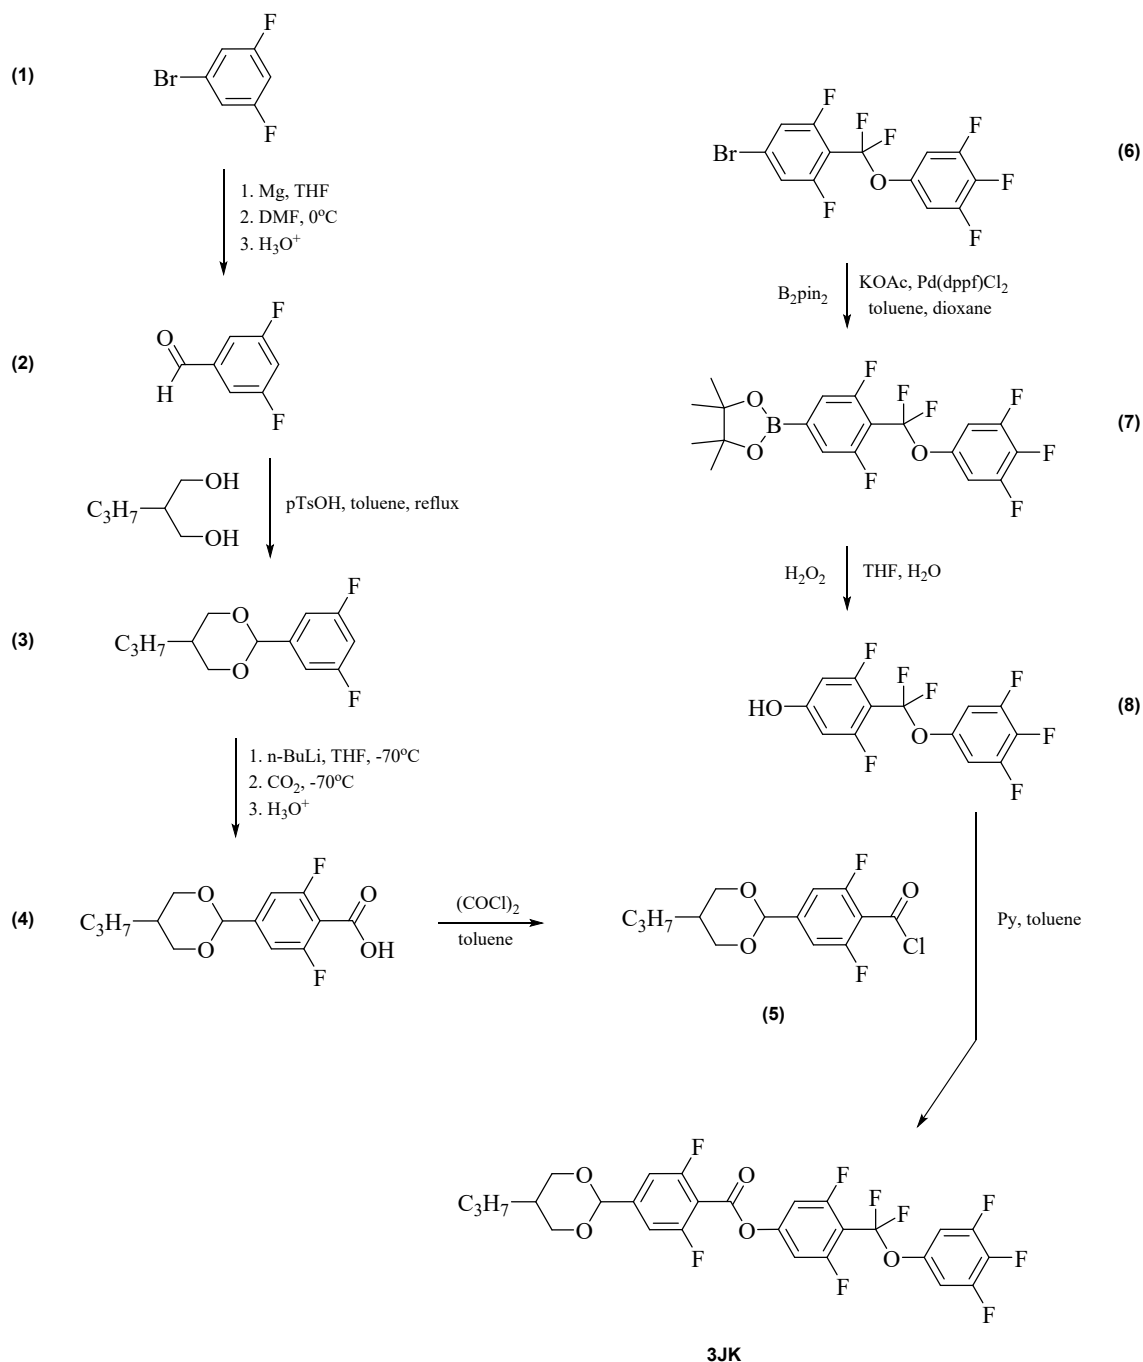

Figure S1. Synthetic route of 3JK.

### 3,5-difluorobenzaldehyde (2)

Magnesium flakes (12.0g; 0.5mol) and THF (300cm<sup>3</sup>) were placed in a 2dm<sup>3</sup> flask and stirred under nitrogen. Small amount of THF solution of 1-bromo-3,5-difluorobenzene (**1**) (96g; 0.5mol) was added to initialize proper reaction. Then, the rest of solution was added dropwise. Temperature was controlled in a way to not exceed a 70°C limit. After addition, the reaction mixture was stirred for 3 hours. Next, dimethylformamide (60cm<sup>3</sup>; 0.75mol) was added dropwise to the reaction mixture reaction at 0°C, solution was warmed up to room

temperature. The mixture was poured into 1500 cm<sup>3</sup> of water and 100 cm<sup>3</sup> of 10% HCl. Crude product was extracted with pentane. Organic layer was washed three times with water, dried over MgSO<sub>4</sub> and solvent was evaporated. Product was purified by distillation under reduced pressure.

Yield 30 g (42%)

Purity 99.78% (GC-MS)

bp=84-86°C (50mmHg)

MS(EI) m/z: 142 (M<sup>+</sup>); 113.

<sup>1</sup>H NMR (500 MHz, CDCl<sub>3</sub>) δ: 9.95 (t, J=1.7 Hz, 1H, Ar-CHO); 7.41 (m, 2H, Ar-H); 7.09 (tt, J=8.4, 2.4 Hz, 1H, Ar-H)

<sup>13</sup>C NMR (125 MHz, CDCl<sub>3</sub>) δ: 189.40 (t, J=2.7 Hz); 163.35 (dd, J=252.5, 11.8 Hz); 139.09 (t, J=7.3 Hz); 112.21 (m); 109.76 (t, J=25.9 Hz)

### ***2-(3,5-difluorophenyl)-5-propyl-1,3-dioxane (3)***

A solution 3,5-difluorobenzaldehyde (**2**) (30g; 0.21mol), 2-propylpropane-1,3-diol (28g; 0.23mol), p-toluenesulfonic acid (0.3g; 2mmol) in toluene (200cm<sup>3</sup>) was refluxed for 4h, while collecting water using Dean-Stark apparatus. After the reaction was completed, mixture was washed three times with water, organic layer was dried over MgSO<sub>4</sub> and concentrated. Product was purified by distillation under reduced pressure.

Yield 45.6 g (90%).

Purity 96,52% (GC-MS)

bp=84-86°C (0.8mmHg)

MS(EI) m/z: 241 (M<sup>+</sup>); 223, 141, 129.

<sup>1</sup>H NMR (500 MHz, CDCl<sub>3</sub>) δ: 7.05 (m, 2H, Ar-H); 6.79 (tt, J=8.9, 2.4 Hz, 1H, Ar-H); 5.47 (s, 0.5H, Ar-CH); 5.37 (s, 0.5H, Ar-CH); 4.25 (dd, J=11.9, 4.6 Hz, 2H, O-CH<sub>2</sub>-CH); 3.53 (t, J=11.4 Hz, 2H, O-CH<sub>2</sub>-CH); 2.12 (m, 0.5H, (OCH<sub>2</sub>)-CH-CH<sub>2</sub>); 1.78 (m, 0.5H, (OCH<sub>2</sub>)-CH-CH<sub>2</sub>); 1.33 (m, 2H, CH-CH<sub>2</sub>-CH<sub>2</sub>); 1,12 (m, 2H, CH<sub>2</sub>-CH<sub>2</sub>-CH<sub>3</sub>), 0,93 (t, J=7,0 Hz, 3H, CH<sub>3</sub>)

<sup>13</sup>C NMR (125 MHz, CDCl<sub>3</sub>) δ: 162.89 (dd, J=248, 12.7 Hz); 142.27 (t, J=9.1 Hz); 109.28 (m); 103.95 (t, J=25.4 Hz); 99,99 (t, J=2.7 Hz); 99.64 (t, J=2.7 Hz); 72.58; 70.65; 34.31; 34.16; 29.74; 29.15; 22.84; 22.78; 14.08; 13.88

### ***2,6-difluoro-4-(5-propyl-1,3-dioxan-2-yl)benzoic acid (4)***

2-(3,5-difluorophenyl)-5-propyl-1,3-dioxane (**3**) (45g; 0.186mol) was mixed with anhydrous THF (300cm<sup>3</sup>) under nitrogen and cooled to -78°C in an acetone/dry ice bath. Solution of n-butyllithium dissolved in cyclohexane-hexane mixture (0.2mol, 2.5M) was added dropwise, and temperature was kept below -70°C. The reaction mixture was stirred for 2.5h in -78°C. Then the reaction was flushed with gaseous carbon dioxide (not exceeding the -65°C). After the reaction was completed, it was allowed to reach room temperature. 10% solution of H<sub>2</sub>SO<sub>4</sub> was added to the mixture. Then the crude product was filtered off, washed with water and hexane. Product was recrystallized three times from hexane-toluene mixture (1:1 v/v).

Yield 28 g (52%).

Purity 99,15% (GC-MS)

mp=126°C

MS(EI) (MS spectra of corresponding methyl ester) m/z: 299 (M<sup>+</sup>); 269, 241, 201, 169, 141, 129

<sup>1</sup>H NMR (500 MHz, CDCl<sub>3</sub>) δ: 11,61 (s, 1H, COOH); 7,15 (d, J=9,5 Hz, 2H, Ar-H); 5,39 (s, 1H, Ar-CH); 4,25 (dd, J=11,5 Hz, 2H, O-CH<sub>2</sub>-CH); 3,54 (t, J=11,5 Hz, 2H, O-CH<sub>2</sub>-CH); 2,19-2,09 (m, 2H, (OCH<sub>2</sub>)-CH-CH<sub>2</sub>); 1,38-1,30 (m, 2H, CH-CH<sub>2</sub>-CH<sub>2</sub>); 1,12-1,08 (m, 2H, CH<sub>2</sub>-CH<sub>2</sub>-CH<sub>3</sub>), 0,93 (t, J=7,5 Hz, 3H, CH<sub>3</sub>)

<sup>13</sup>C NMR (125 MHz, CDCl<sub>3</sub>) δ: 166.82, 161.20 (dd, J=258.9, 5.5 Hz), 145.36 (t, J=10 Hz), 110.27 (m), 109.43 (t, J=16.4 Hz), 98.86, 72.56, 33.88, 30.20, 19.52, 14.18

### ***2-(4-(difluoro(3,4,5-trifluorophenoxy)methyl)-3,5-difluorophenyl)-4,4,5,5-tetramethyl-1,3,2-dioxaborolane (7)***

A solution of 5-bromo-2-(difluoro(3,4,5-trifluorophenoxy)methyl)-1,3-difluorobenzene (**6**) (15g ; 0.038mol), bis(pinacolato)diboron (10g ; 0.038mol), anhydrous potassium acetate (11g ; 0.11mol) in toluene (300cm<sup>3</sup>) and 1,4-dioxane (300cm<sup>3</sup>) was flushed with nitrogen at 80°C for 1h. Then the catalyst Pd(dppf)Cl<sub>2</sub> (3mol%) was added and reaction was stirred at 80°C for 5h. Next reaction was cooled to room temperature and poured into 5% HCl solution. Product was extracted with toluene; organic layer was washed three times with water and dried over MgSO<sub>4</sub>. Solvent was evaporated under vacuum. Product was recrystallized from ethanol.

Yield 10g (60%),

Purity 99,95% (GC-MS)

mp=94°C.

MS(EI)m/z: 437 (M<sup>+</sup>); 421; 289; 207; 189

<sup>1</sup>H NMR (500 MHz, CDCl<sub>3</sub>) δ: 7,40 (d, J=10 Hz, 2H, Ar-H), 6,98 (m, 2H, Ar-H); 1,37 (s, 12H, CH<sub>3</sub>)

<sup>13</sup>C NMR (125 MHz, CDCl<sub>3</sub>) δ: 159.55 (dd, J=261.6, 1.8 Hz); 150.98 (dq, J=250.7, 5.5 Hz); 144.76 (m); 139.43 (t, J=15 Hz); 137.44 (t, J=15.4 Hz); 122.36; 120.24; 118.07 (m); 111.69 (m); 107.43 (m); 84.90; 24.80

### ***4-(difluoro(3,4,5-trifluorophenoxy)methyl)-3,5-difluorophenol (8)***

Flask containing 2-(4-(difluoro(3,4,5-trifluorophenoxy)methyl)-3,5-difluorophenyl)-4,4,5,5-tetramethyl-1,3,2-dioxaborolane (**7**) (10g; 0.023mol), 30% solution of H<sub>2</sub>O<sub>2</sub> (20cm<sup>3</sup>), tetrahydrofuran 100cm<sup>3</sup> and water 100cm<sup>3</sup> was mixed at 50°C for 4h. After the reaction was completed THF was evaporated and 5% HCl solution was added. Product was extracted with dichloromethane, organic layer was washed three times with water, dried over MgSO<sub>4</sub> and concentrated. Product was recrystallized twice from hexane.

Yield 3,89 g (52%).

Purity 96,75% (GC-MS)

mp=190°C

MS(EI) m/z: 326 (M<sup>+</sup>); 307; 179

<sup>1</sup>H NMR (500 MHz, CDCl<sub>3</sub>) δ: 8,19 (s, 1H, OH); 6,96 (m, 2H, Ar-H); 6,47 (d, J=11 Hz, 2H, Ar-H)

$^{13}\text{C}$  NMR (125 MHz,  $\text{CDCl}_3$ )  $\delta$ : 161.04 (dd,  $J=255.2, 8.2$  Hz), 160.59 (t,  $J=15.0$  Hz), 151.95 (dd,  $J=10.5, 5.0$  Hz), 149.96 (dd,  $J=10.5, 5.0$  Hz), 144.94 (m), 139.30 (t,  $J=15.0$  Hz), 120.58 (t,  $J=264.3$  Hz), 107.33 (m), 101.75 (m), 100.42 (m)

***4-(difluoro(3,4,5-trifluorophenoxy)methyl)-3,5-difluorophenyl 2,6-difluoro-4-(5-propyl-1,3-dioxan-2-yl)benzoate (3JK)***

In the first stage acid chloride ***2,6-difluoro-4-(5-propyl-1,3-dioxan-2-yl)benzoyl chloride (5)*** was synthesized. In the 250cm<sup>3</sup> round-bottom flask ***2,6-difluoro-4-(5-propyl-1,3-dioxan-2-yl)benzoic acid (4)*** (1.2g; 4.2 mmol), oxalyl chloride (0.55cm<sup>3</sup>; 6mmol), 50cm<sup>3</sup> toluene and DMF (0.1 cm<sup>3</sup>) were added and stirred at RT for 5 hours. Then the excess oxalyl chloride was distilled off. In the second stage, the reaction mixture was cooled to room temperature and ***4-(difluoro(3,4,5-trifluorophenoxy)methyl)-3,5-difluorophenol (8)*** (1.5g; 4.6mmol) was added. Then anhydrous pyridine (1cm<sup>3</sup>; 8.4mmol) was added dropwise at room temperature. The reaction was stirred at RT for 12 hours. Then the reaction mixture was poured into a HCl (10%) solution. The organic layer was washed three times with water, dried over  $\text{MgSO}_4$ , and concentrated on a rotary evaporator. Crude product was purified by liquid column chromatography (dichloromethane as a mobile phase) and recrystallized from ethyl alcohol, yielding white crystals.

Yield 1.5g (60%).

Purity 99,45% (GC-MS); 99,48% (LC-MS)

MS (EI)  $m/z$ : 593 (M<sup>+</sup>), 447, 347, 269

$^1\text{H}$  NMR (500 MHz,  $\text{CDCl}_3$ )  $\delta$ : 7,21 (d,  $J=9$  Hz, 2H, Ar-H); 7,05-6,97 (m, 4H, Ar-H); 5,42 (s, 1H, Ar-CH); 4,27 (dd,  $J=11,5$  Hz, 2H, O- $\text{CH}_2$ -CH); 3,56 (t,  $J=11,5$  Hz, 2H, O- $\text{CH}_2$ -CH); 2,19-2,12 (m, 2H, (OCH<sub>2</sub>)- $\text{CH}$ -CH<sub>2</sub>); 1,40-1,33 (m, 2H, CH- $\text{CH}_2$ -CH<sub>2</sub>); 1,14-1,10 (m, 2H, CH<sub>2</sub>- $\text{CH}_2$ -CH<sub>3</sub>), 0,95 (t,  $J=7,5$  Hz, 3H, CH<sub>3</sub>)

$^{13}\text{C}$  NMR (125 MHz,  $\text{CDCl}_3$ )  $\delta$ : 161.04 (dd,  $J=259.8, 5.5$ Hz); 160.36 (dd,  $J=258.9, 7.26$  Hz); 158.32; 153.32 (t,  $J=14.08$  Hz); 152.02 (dd,  $J=10.90, 5.45$  Hz); 150.02 (dd,  $J=10.44, 5.00$  Hz); 146.27 (t,  $J=9.99$  Hz); 144.53 (m); 138.51 (dt,  $J=250.69, 15.44$  Hz); 119.93 (t,  $J=266.58$  Hz); 110.42 (m); 108.31 (m); 107.49 (m); 107.12 (dd,  $J=26.79, 4.09$  Hz); 98.69, 72.59, 33.90, 30.21, 19.53, 14.16

$^{19}\text{F}$  NMR (470 MHz,  $\text{CDCl}_3$ )  $\delta$ : -61.36 (t,  $J=26,7$  Hz, 2F); -107.93 (d,  $J=9.6$  Hz, 2F); -108.24 (td,  $J=26.5, 9.9$  Hz, 2F); -132.37 (dd,  $J=20.8, 8.2, 2$ F); -162.97 (tt,  $J=20.8, 5.4$  Hz, 1F)

### 3) Mesomorphic properties

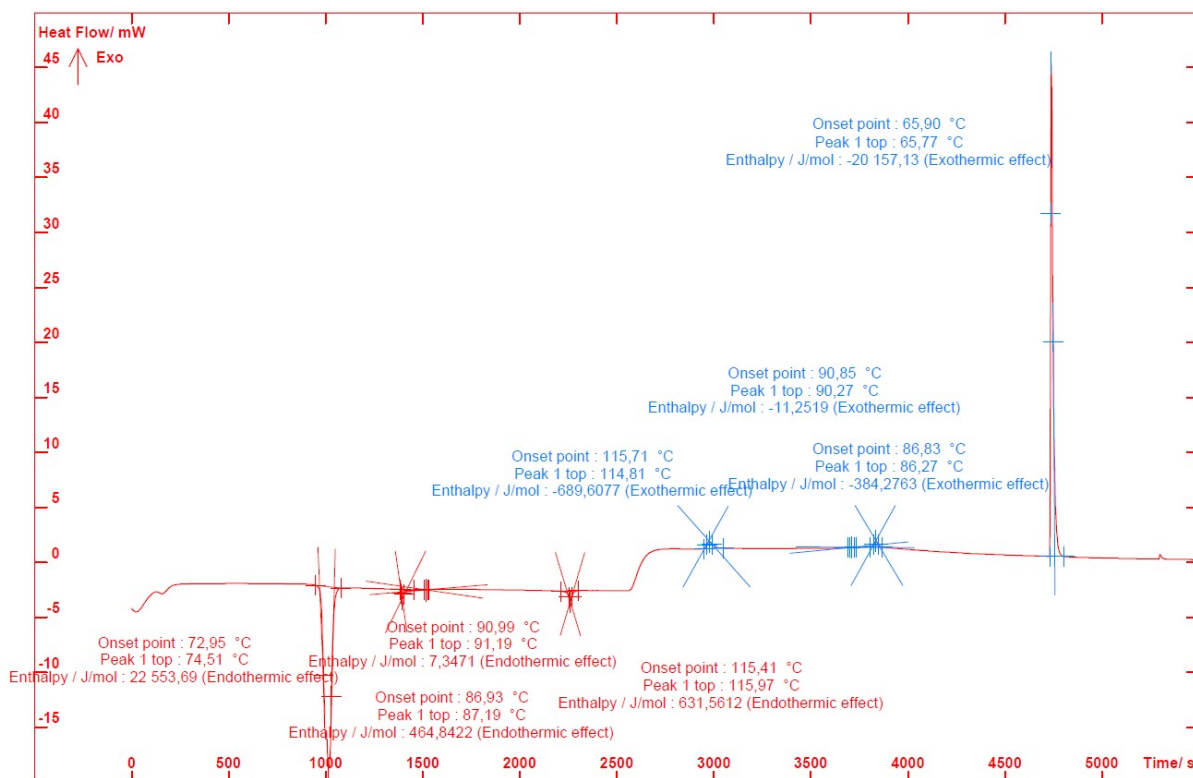

Figure S2. DSC thermogram of 3JK.

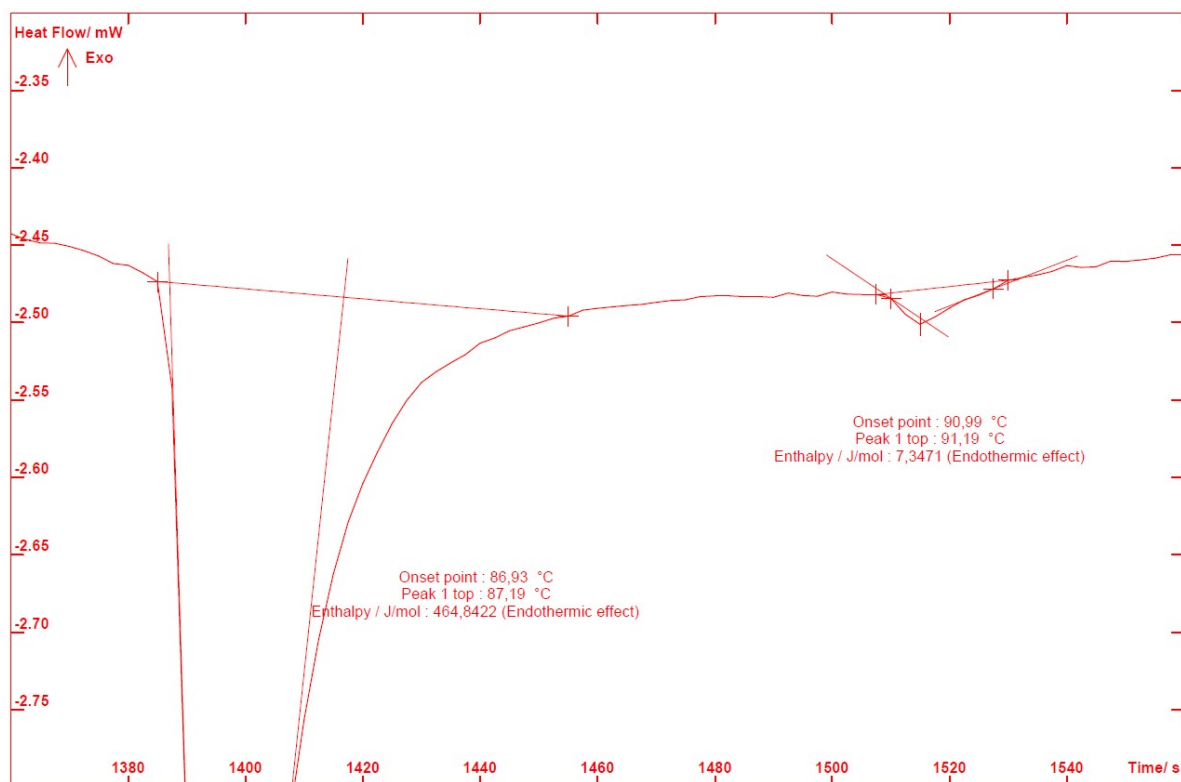

Figure S3. Expanded DSC curve of  $N_F-N_X-N$  transition.



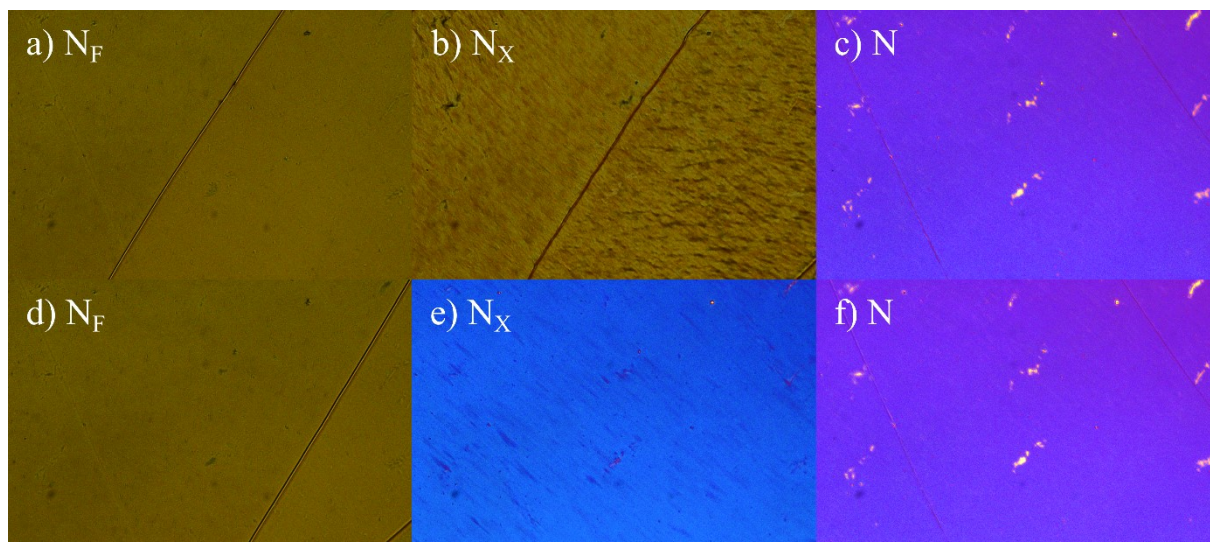

Figure S4. POM textures of  $N_F$ ,  $N_X$  and  $N$  phases of 3JK in a  $5\mu\text{m}$ -thick planar cell in heating (a-c) and cooling (d-f) cycle.

Table S1. Phase transition temperatures of mixtures of 3JK with RM734 and DIO.

| Mixture               |         | Phase transitions temperatures              |
|-----------------------|---------|---------------------------------------------|
| <b>3JK with RM734</b> |         |                                             |
| <b>0.1</b>            | heating | Cr 72 $N_F$ 92 $N_X$ 96 $N$ 123 Iso         |
|                       | cooling | Iso 122.8 $N$ 95.5 $N_X$ 92.3 $N_F$ 68 Cr   |
| <b>0.2</b>            | heating | Cr 74 $N_F$ 94.8 $N_X$ 97.4 $N$ 125,8 Iso   |
|                       | cooling | Iso 124 $N$ 97 $N_X$ 94 $N_F$ 53.3 Cr       |
| <b>0.3</b>            | heating | Cr 76 $N_F$ 100 $N_X$ 102.4 $N$ 137 Iso     |
|                       | cooling | Iso 135 $N$ 106.7 $N_X$ 104.5 $N_F$ 42 Cr   |
| <b>0.4</b>            | heating | Cr 77 $N_F$ 102.8 $N_X$ 104.9 $N$ 144.5 Iso |
|                       | cooling | Iso 138 $N$ 107 $N_X$ 105,5 $N_F$ 44,5 Cr   |
| <b>0.5</b>            | heating | Cr 96 $N_F$ 109,5 $N_X$ 111,5 $N$ 152,5 Iso |
|                       | cooling | Iso 152 $N$ 110 $N_X$ 109 $N_F$ 49 Cr       |
| <b>0.6</b>            | heating | Cr 130 $N$ 160 Iso                          |
|                       | cooling | Iso 155 $N$ 120,5 $N_F$ 45 Cr               |
| <b>0.8</b>            | heating | Cr 134 $N$ 172 Iso                          |
|                       | cooling | Iso 169,6 $N$ 124,5 $N_F$ 62,3 Cr           |
| <b>3JK with DIO</b>   |         |                                             |
| <b>0.2</b>            | heating | Cr 64 $N_F$ 89 $N_X$ 95 $N$ 126 Iso         |
|                       | cooling | Iso 124.7 $N$ 85.8 $N_X$ 81.2 $N_F$ 47.8 Cr |

|            |         |                                                           |
|------------|---------|-----------------------------------------------------------|
| <b>0.4</b> | heating | Cr 45 N <sub>F</sub> 84,8 N <sub>X</sub> 93 N 136,5 Iso   |
|            | cooling | Iso 135.1 N 92 N <sub>X</sub> 84,5 N <sub>F</sub> 33.9 Cr |
| <b>0.5</b> | heating | Cr 56,5 N <sub>F</sub> 82,5 N <sub>X</sub> 91,5 N 152 Iso |
|            | cooling | Iso 147 N 90.5 N <sub>X</sub> 79.5 N <sub>F</sub> 16 Cr   |
| <b>0.6</b> | heating | Cr 58 N <sub>F</sub> 81,5 N <sub>X</sub> 91 N 150 Iso     |
|            | cooling | Iso 149 N 90 N <sub>X</sub> 79.8 N <sub>F</sub> <0 Cr     |
| <b>0.7</b> | heating | Cr 64 N <sub>F</sub> 77 N <sub>X</sub> 87 N 154 Iso       |
|            | cooling | Iso 154 N 88 N <sub>X</sub> 76,5 N <sub>F</sub> <0 Cr     |
| <b>0.8</b> | heating | Cr 71,5 N 162 Iso                                         |
|            | cooling | Iso 161 N 87.4 N <sub>X</sub> 73 N <sub>F</sub> <0 Cr     |

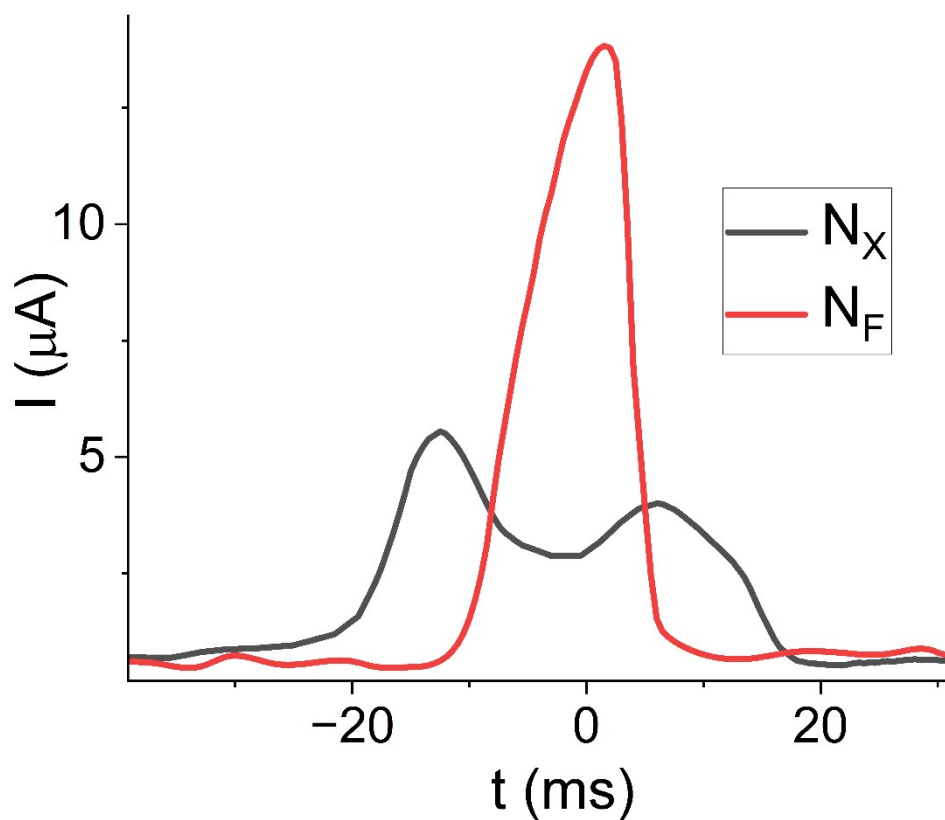

Figure S5. Current response in the  $N_X$  (grey line) and  $N_F$  (red line) under 9 Hz triangular voltage.

## 4) References

1. Frisch MJ, Trucks GW, Schlegel HB, Scuseria GE, Robb MA, Cheeseman JR, et al. Gaussian 16 Rev. C.01. Wallingford, CT2016.
2. Lee C, Yang W, Parr RG. Development of the Colle-Salvetti correlation-energy formula into a functional of the electron density. *Physical Review B*. 1988;37(2):785-9.
3. Becke AD. Density-functional thermochemistry. III. The role of exact exchange. *The Journal of Chemical Physics*. 1993;98(7):5648-52.
4. Hehre WJ, Ditchfield R, Pople JA. Self-Consistent Molecular Orbital Methods. XII. Further Extensions of Gaussian-Type Basis Sets for Use in Molecular Orbital Studies of Organic Molecules. *The Journal of Chemical Physics*. 2003;56(5):2257-61.
